# Supplementary material
Source: publisher site journal article supplement (https://www.dovepress.com/article/347607)

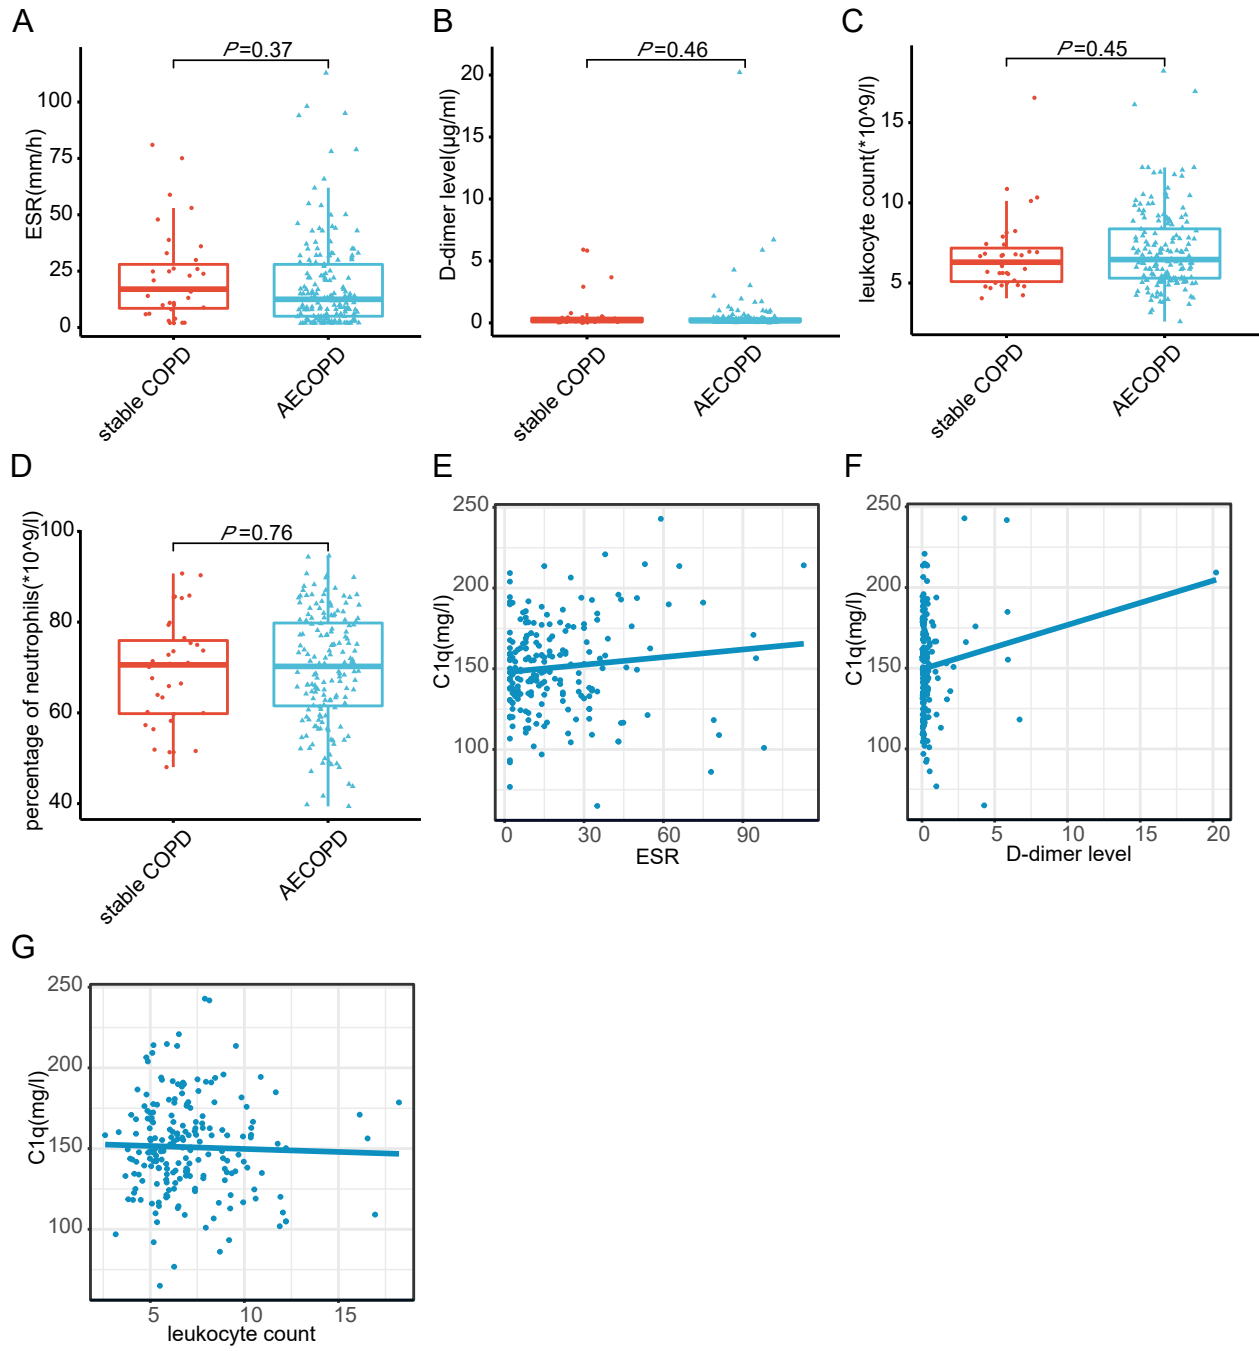

Supplement: Supplementary file 1 [file 26_Jan_2022_Supplementary_Figure_1.pdf › 26_Jan_2022_Supplementary_Figure_1.pdf]

A

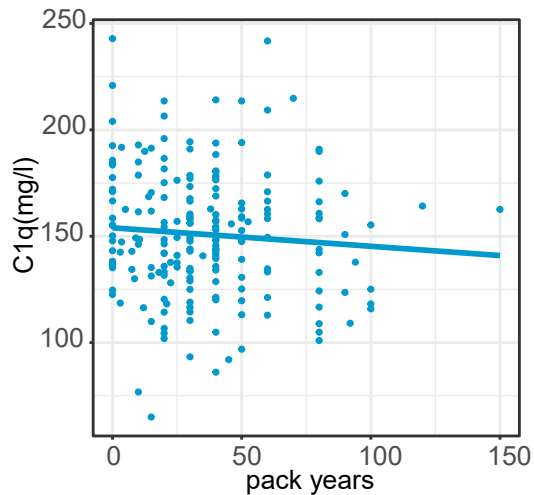

B

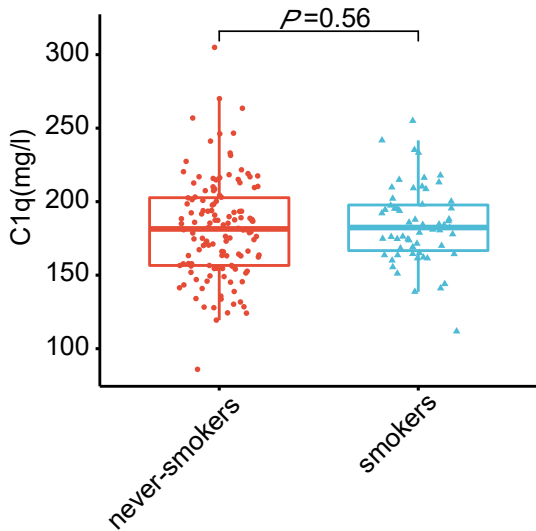

Supplement: Supplementary file 2 [file 26_Jan_2022_Supplementary_Figure_2.pdf › 26_Jan_2022_Supplementary_Figure_2.pdf]
